# Supplementary material for: Gapless Genome Assembly of Puccinia triticina Provides Insights into Chromosome Evolution in Pucciniales
Source: PubMed Central journal article supplement (PMC9927501; doi:10.1128/spectrum.02828-22), 2023-01-23
Supplement: spectrum.02828-22-s0001.pdf [file spectrum.02828-22-s0001.pdf]

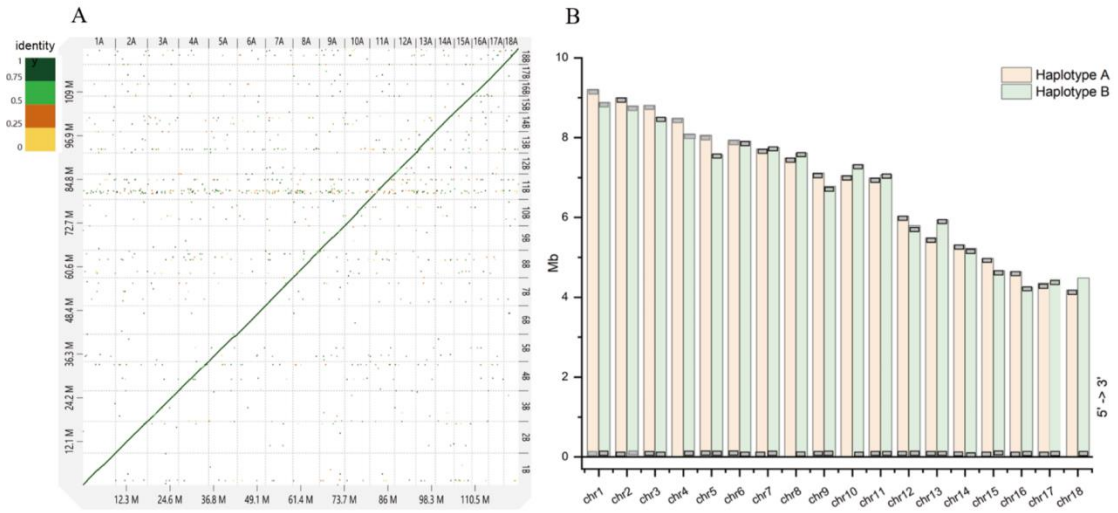

**Fig. S1.** Chromosome structure in Pt15. **A** Whole-genome pairwise alignment showing homologous chromosome pairs. **B** Chromosome comparison of both haplotypes. Horizontal rectangle indicates telomeric sequence of each chromosome.

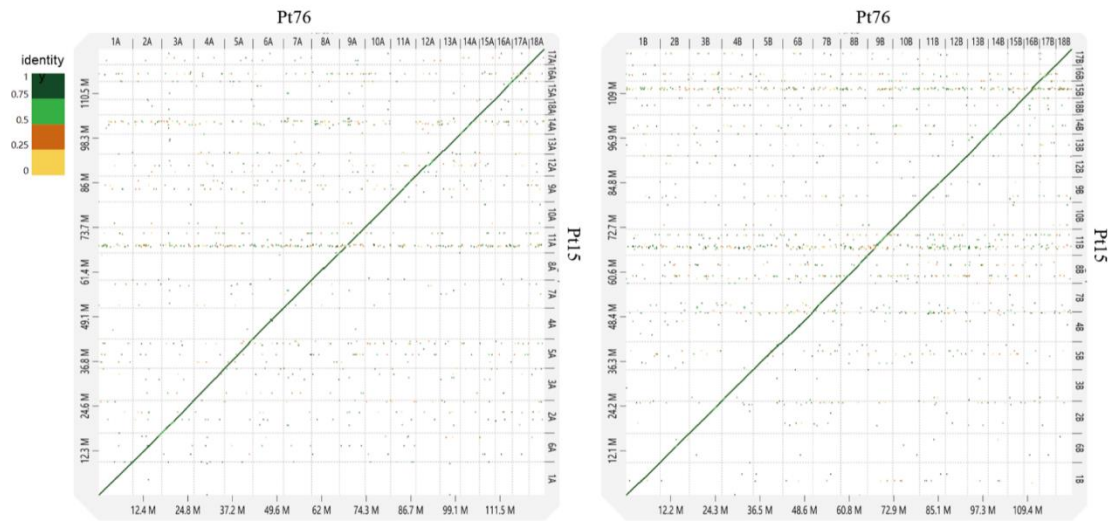

**Fig. S2.** Whole-genome pairwise alignment of genome assemblies for Pt76 and Pt15.

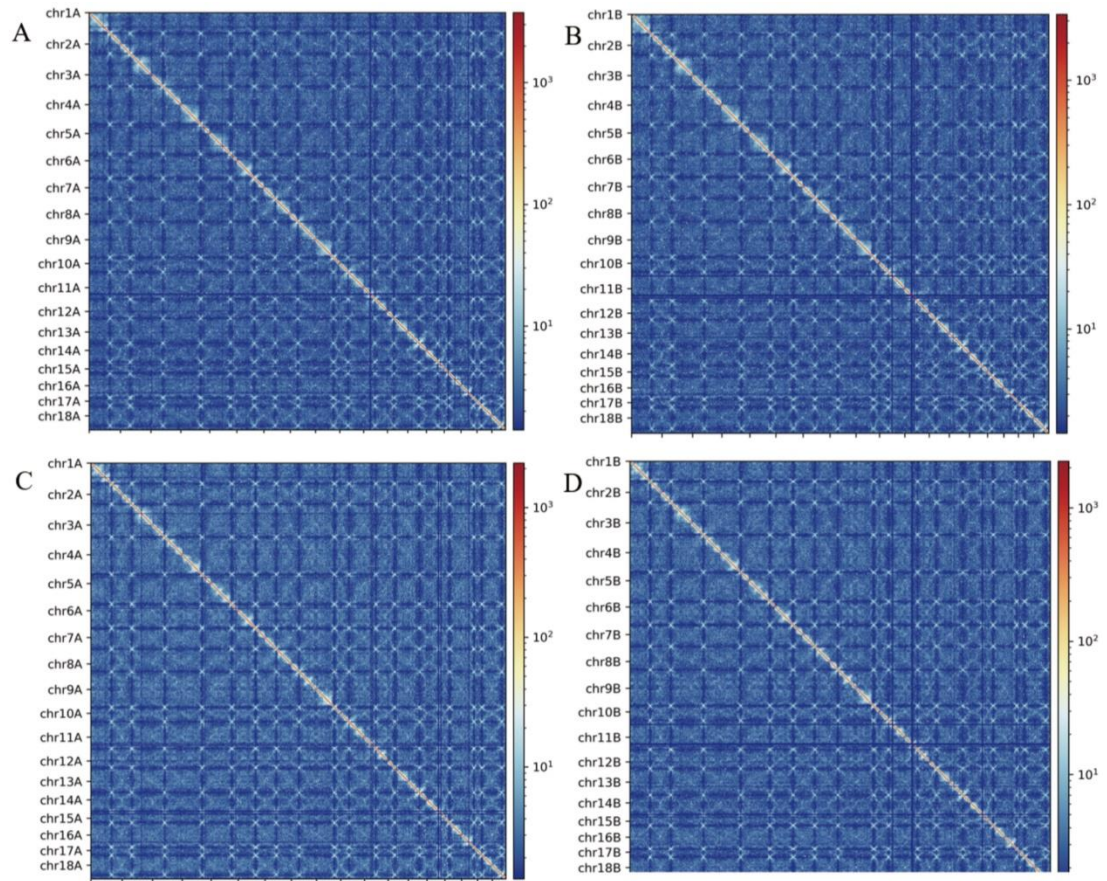

**Fig. S3.** Hi-C contact maps of genome assembly in Pt15. Hi-C sequencing reads of (A) (B) and (C) (D) were from the Pt76 and Pt64 genomes, respectively.

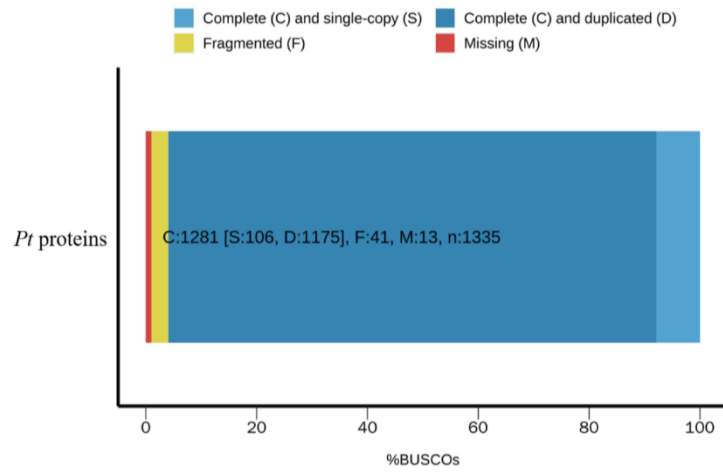

**Fig. S4.** BUSCO assessment of predicted proteins in Pt15.

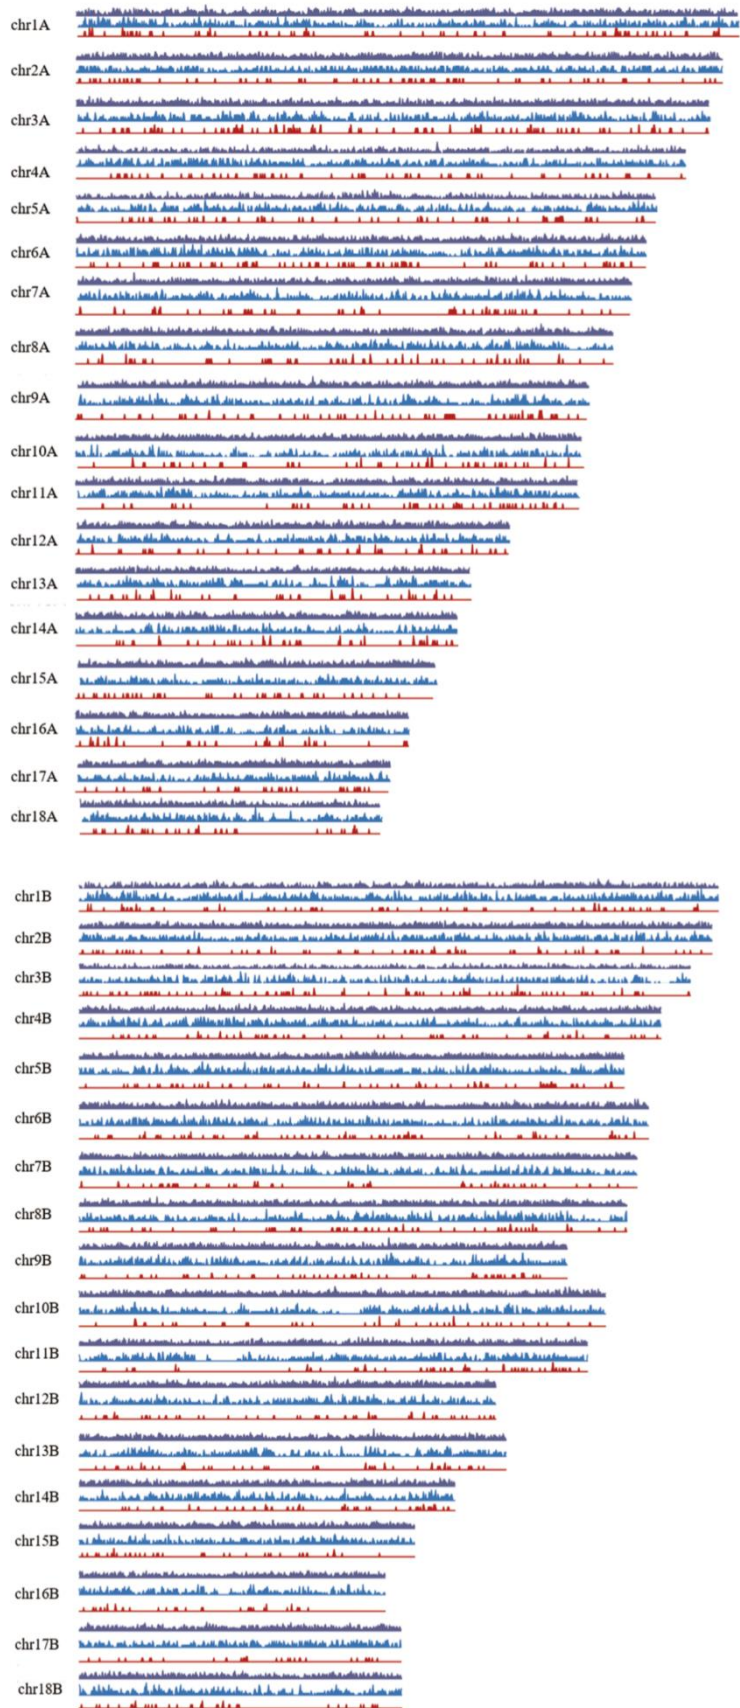

**Fig. S5.** Repeat and gene densities for the Pt15 chromosomes. From top to bottom, repetitive sequences, all the genes and secreted protein genes are shown for each chromosome, respectively.



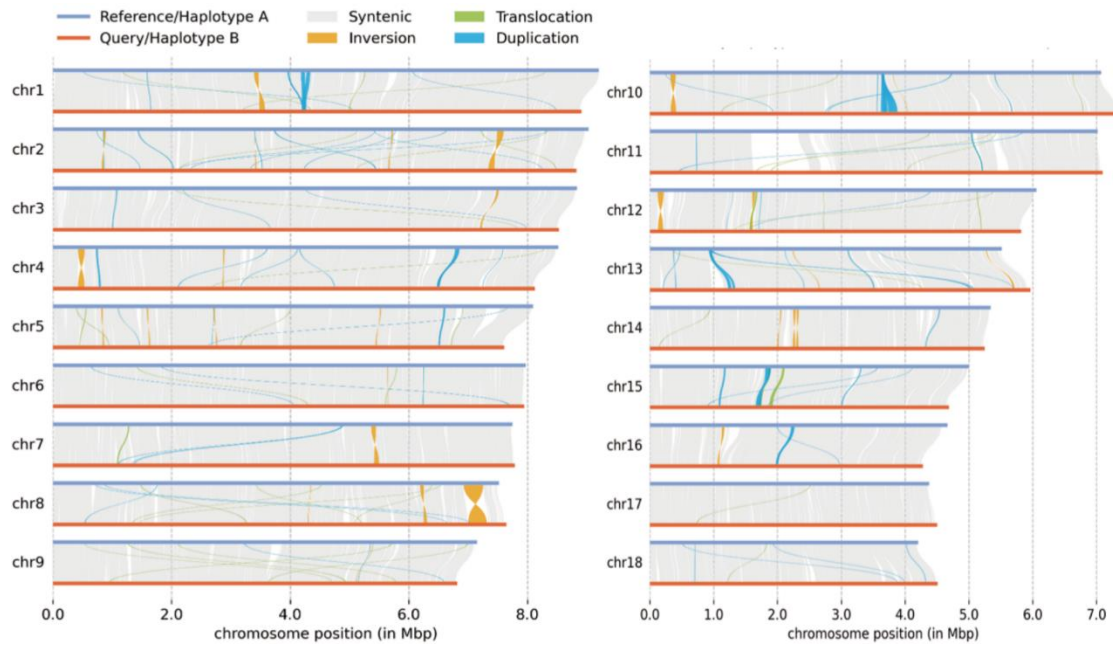

**Fig. S6.** Structural variation between homologous chromosomes. The blocks greater than 5 kb are shown.

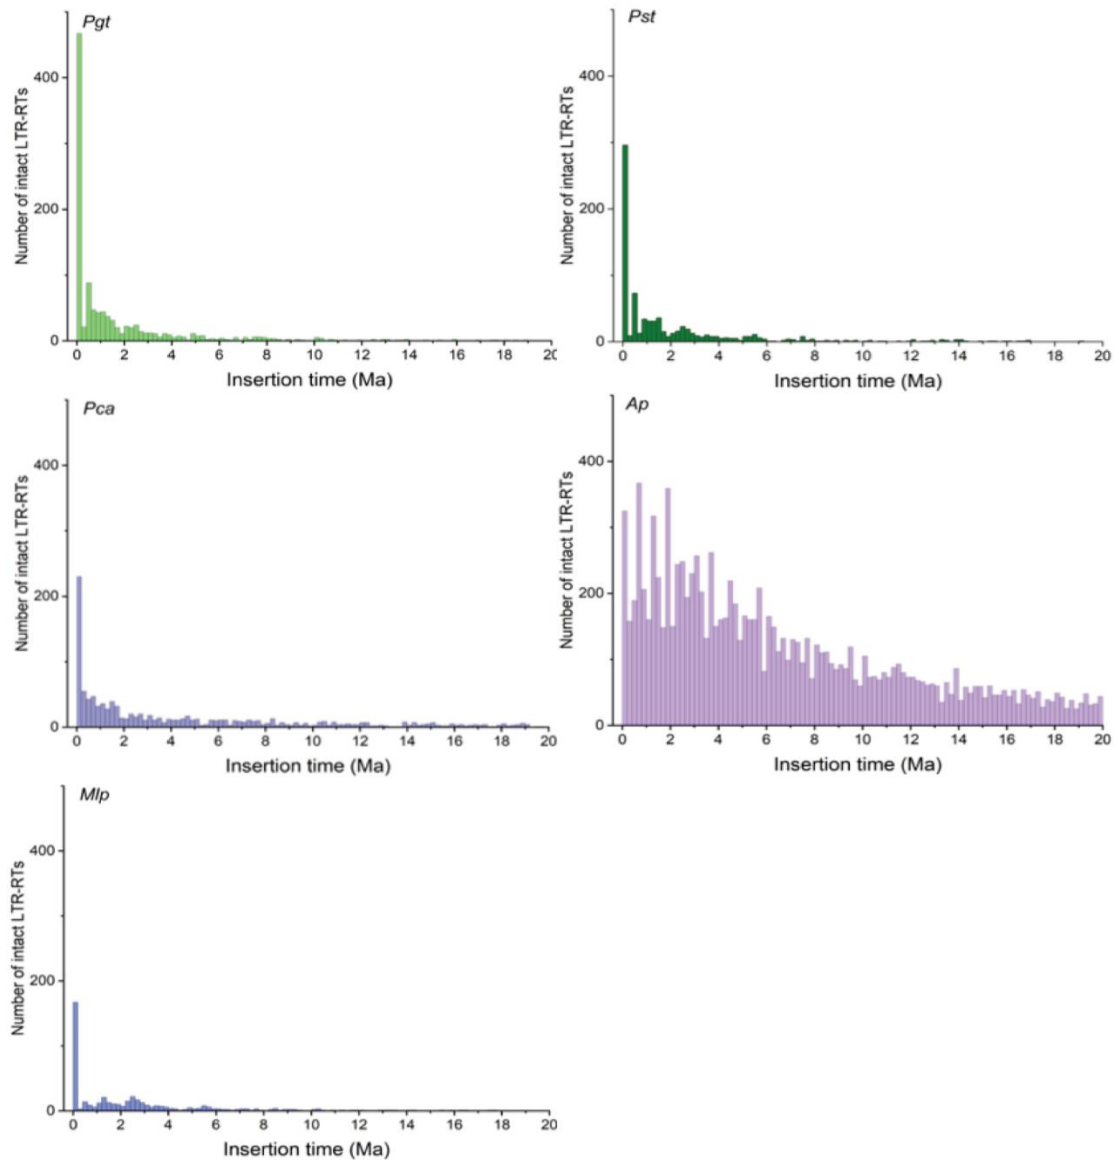

**Fig. S7.** Insertion time of LTR-RTs in *Pgt*, *Pst*, *Pca*, *Ap* and *Mlp*. MA: one million years.

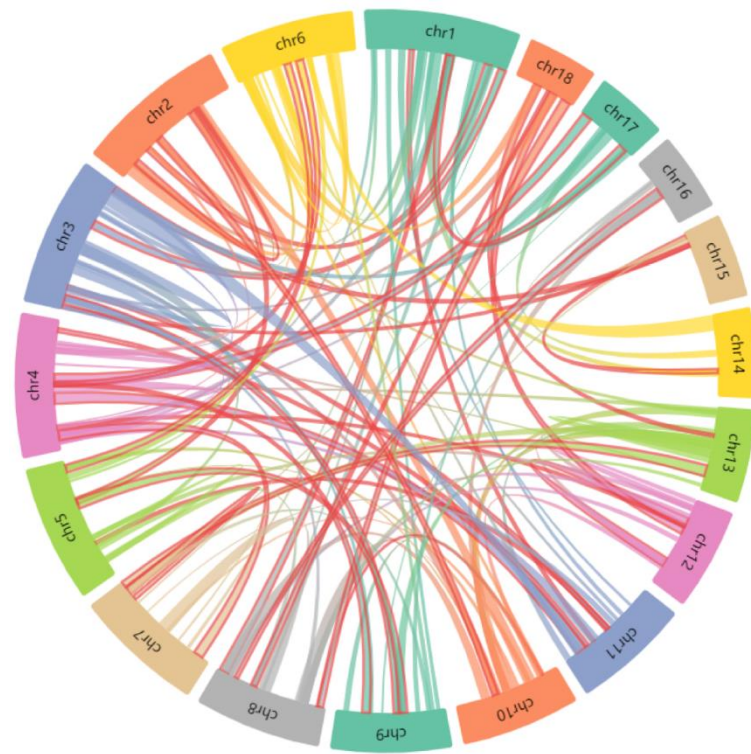

**Fig. S8.** Gene collinearity showing gene duplicates in *Pt.* MCScanX result is visualized using AccuSyn (<https://accusyn.usask.ca/>).



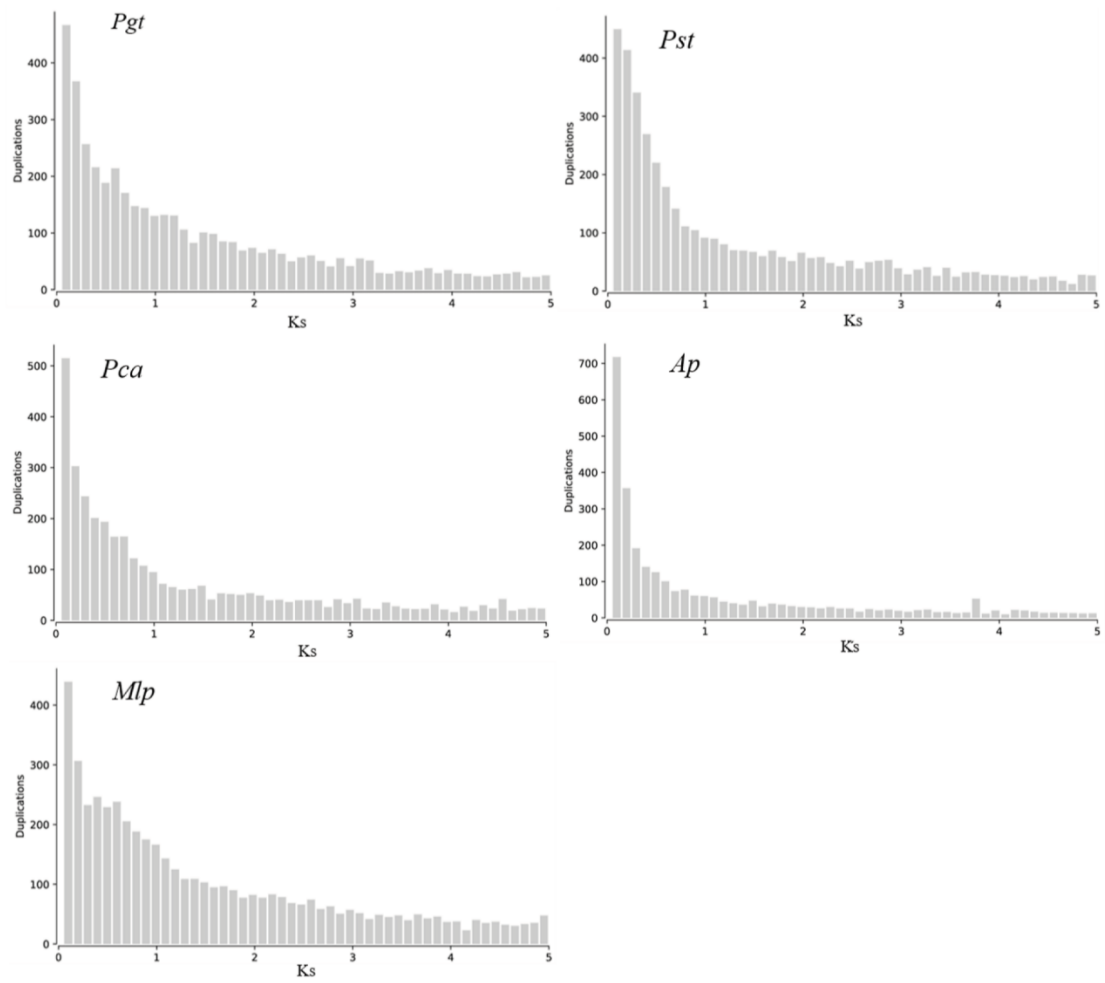

**Fig. S9.** Ks distribution of paralogues in *Pgt*, *Pst*, *Pca*, *Ap* and *Mlp*.

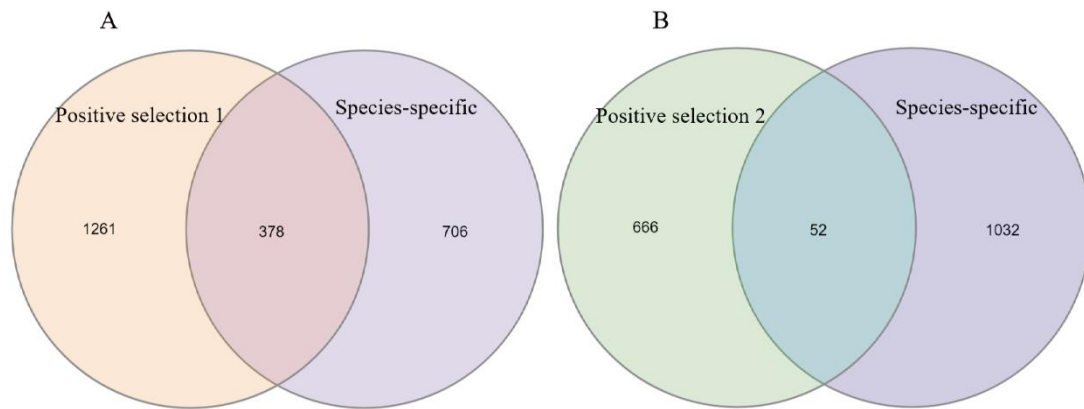

**Fig. S10.** Venn diagram showing the relation of species-specific genes and genes that underwent positive selection in *Pt*. **A** After *Pt-Pgt* divergence. **B** Before *Pt-Pgt* divergence.

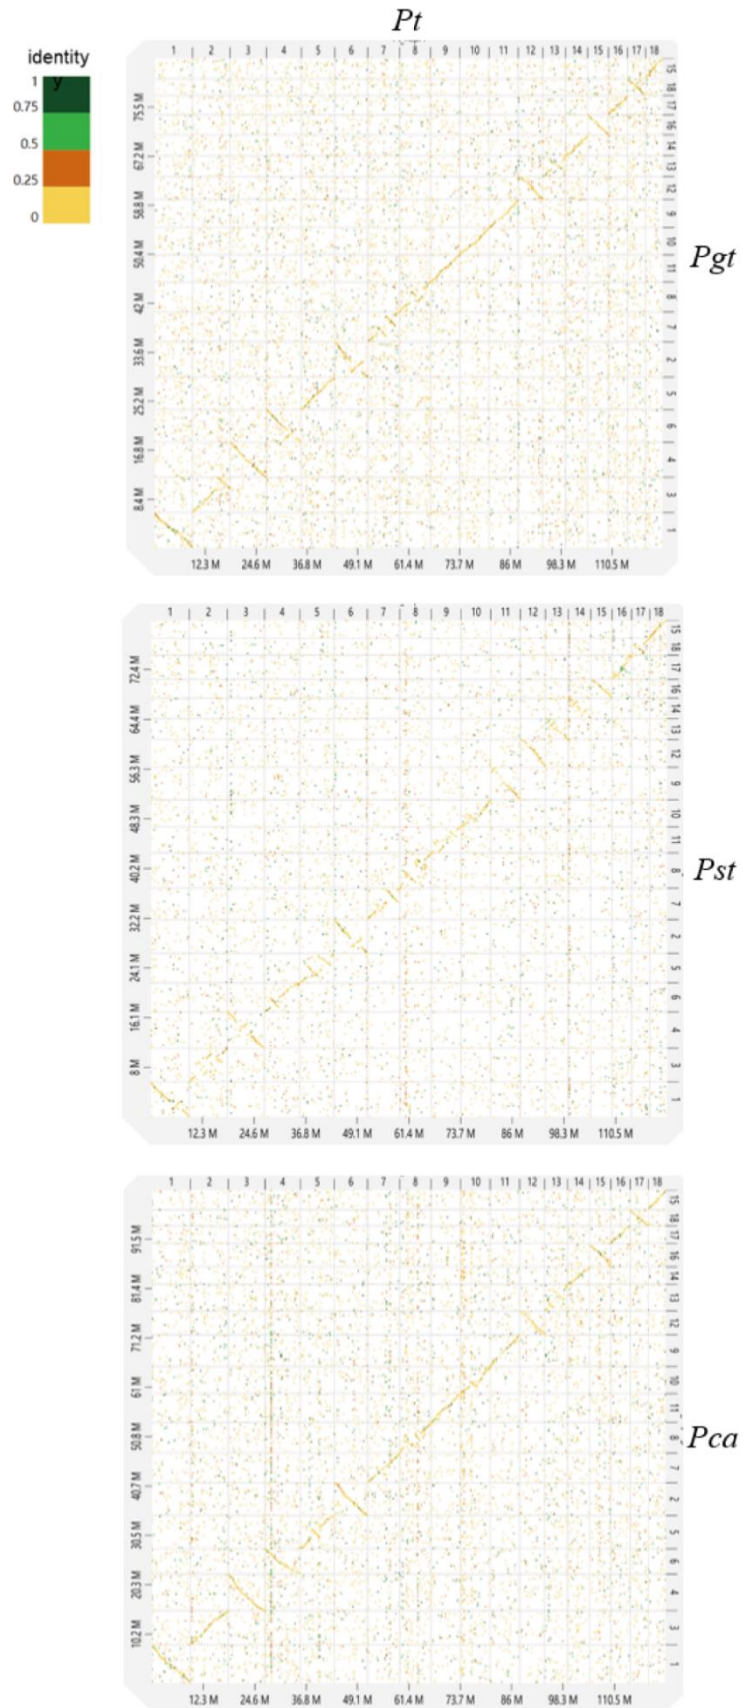

**Fig. S11.** Whole-genome pairwise alignments between chromosome-level assemblies of *Pt*, *Pgt*, *Pst* and *Pca*. X-axis represents *Pt*. Y-axis represents *Pgt*, *Pst* and *Pca*, respectively.

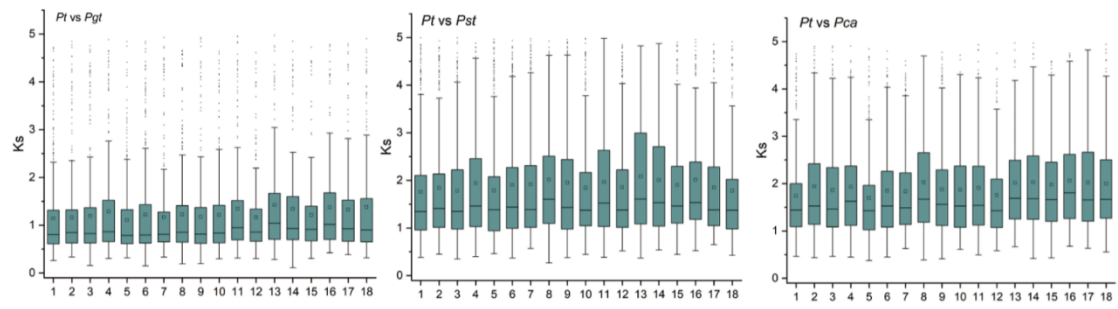

**Fig. S12.** Ks distribution of gene pairs between syntenic blocks on each chromosome of *Pgt*, *Pst* and *Pca* compared to *Pt*. Chromosome numbers are shown on x-axis.

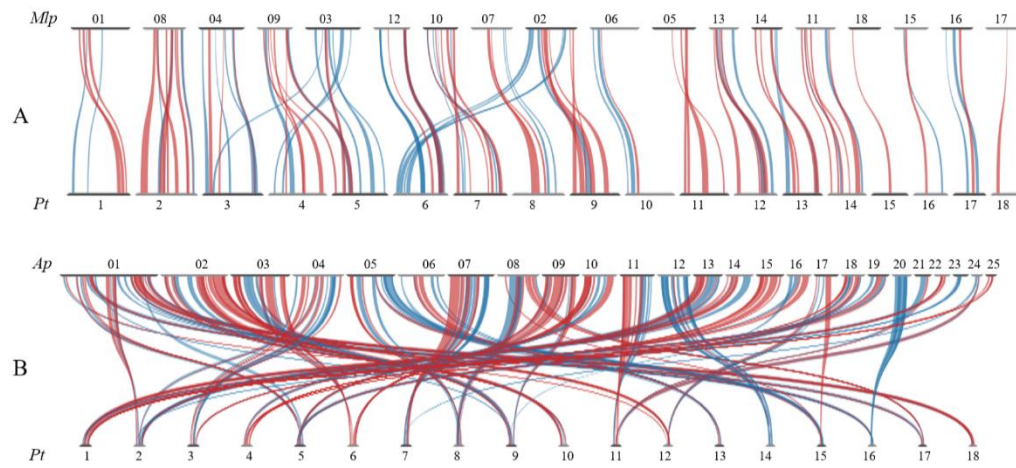

**Fig. S13.** Gene synteny in *Pt-Mlp* (A) and *Pt-Ap* (B). Syntenic blocks containing at least five genes are shown. Chromosome numbers are shown for *Pt* and *Mlp*. Sequence numbers are shown for *Ap*.
